# Supplementary material for: Loss-of-Function Mutations in the CFH Gene Affecting Alternatively Encoded Factor H-like 1 Protein Cause Dominant Early-Onset Macular Drusen
Source: PubMed Central journal article supplement (PMC6856713; doi:10.1016/j.ophtha.2019.03.013), 2019-10
Supplement: mmc6.pdf [file mmc6.pdf]

Supplementary Data C

| A:II.3 and A:II.1 WES data filtering |                    |                                                      |                            |                                                                                                                                                                                                                                                                                                                           |
|--------------------------------------|--------------------|------------------------------------------------------|----------------------------|---------------------------------------------------------------------------------------------------------------------------------------------------------------------------------------------------------------------------------------------------------------------------------------------------------------------------|
| Filter                               | Number of Variants |                                                      |                            |                                                                                                                                                                                                                                                                                                                           |
| Rare Shared                          | 301                |                                                      |                            |                                                                                                                                                                                                                                                                                                                           |
| Rare shared PAV                      | 204                |                                                      |                            |                                                                                                                                                                                                                                                                                                                           |
| Rare shared PAV, known IRD genes     | 7                  | Variants of Interest                                 | Interpretation             | Justification                                                                                                                                                                                                                                                                                                             |
|                                      |                    | NM_000186.3(CFH):c.1243del, p.(Ala415ProfsTer39) het | Likely pathogenic mutation | Not present on gnomAD<br>Null variant in gene where LOF is a known mechanism of disease<br>Not previously reported as disease-causing                                                                                                                                                                                     |
|                                      |                    | ENST00000264448.6(ALMS1):c.2033A>G, p.(Tyr678Cys)    | Carrier of VUS             | High allele frequency in European (non-Finnish) population (293/125986)<br>Heterozygous change in recessive gene<br>Gene does not correlate with patient phenotype<br>Predicted deleterious <i>in silico</i> (SIFT: Deleterious (0); Polyphen22 (probably damaging (0.997))<br>Not previously reported as disease-causing |
|                                      |                    | NM_178857.5(RP1L1):c.6992C>T, p.(Thr2331Met) het     | Benign                     | High allele frequency in European (non-Finnish) population (gnomAD: 353/126708)<br>Predicted benign <i>in silico</i> (SIFT: Tolerated (0.15); Polyphen22: benign (0.002))<br>Gene does not correlate with patient phenotype<br>ClinVAR status: Likely benign (RCV000296962.1)                                             |
|                                      |                    | NM_014956.4(CEP164):c.3869C>T, p.(Pro1290Leu)        | Carrier of VUS             | Rare variant in European (non-Finnish) population (10/126624, 0.00007897)<br>Equivocal <i>in silico</i> results (SIFT: Del (0); Polyphen22: Benign: 0.045)                                                                                                                                                                |

Supplementary Data C

|  |  |                                                      |                |                                                                                                                                                                                                                                                                                                                                                                                               |
|--|--|------------------------------------------------------|----------------|-----------------------------------------------------------------------------------------------------------------------------------------------------------------------------------------------------------------------------------------------------------------------------------------------------------------------------------------------------------------------------------------------|
|  |  |                                                      |                | <p>Heterozygous change in recessive gene<br/>Gene does not correlate with patient phenotype<br/>Not previously reported as disease-causing</p>                                                                                                                                                                                                                                                |
|  |  | NM_014336.3(AIPL1):c.737A>C,<br>p.(Tyr246Ser) het    | Carrier of VUS | <p>Rare variant in European (non-Finnish) population (gnomAD: 21/1266694, 0.0001658)<br/>Predicted deleterious <i>in silico</i> (SIFT: Deleterious (0.01); Polyphen2 (Probably damaging (0.991))<br/>Highly conserved amino acid (GERP: 5.15)<br/>Heterozygous change in recessive gene<br/>Gene does not correlate with patient phenotype<br/>Not previously reported as disease-causing</p> |
|  |  | NM_000554.4(CRX):c.196G>A,<br>p.(Val66Ile) het       | Benign         | <p>High frequency in European (non-Finnish) population (225/257790, 0.00724)<br/>Equivocal <i>in silico</i> result (SIFT: Deleterious (0); Polyphen2: Benign (0.033))<br/>Gene does not correlate with patient phenotype<br/>ClinVAR status: Benign (RCV000297047.1)</p>                                                                                                                      |
|  |  | NM_001042472.2(ABHD12):c.787+3G>A,<br>p.(splice) het | Carrier of VUS | <p>Moderately high allele frequency in European (non-Finnish) population (34/24942, 0.001363)<br/>Not predicted to affect splicing <i>in silico</i><br/>Heterozygous change in recessive gene<br/>Gene does not correlate with patient phenotype<br/>Not previously reported as disease-causing</p>                                                                                           |

Supplementary Data C

| B:II.2 Focused exome data filtering |                    |                                                   |                        |                                                                                                                                                                                                                                                                                                           |
|-------------------------------------|--------------------|---------------------------------------------------|------------------------|-----------------------------------------------------------------------------------------------------------------------------------------------------------------------------------------------------------------------------------------------------------------------------------------------------------|
| Filter                              | Number of Variants |                                                   |                        |                                                                                                                                                                                                                                                                                                           |
| All                                 | 8,935              |                                                   |                        |                                                                                                                                                                                                                                                                                                           |
| All PAV                             | 1,439              |                                                   |                        |                                                                                                                                                                                                                                                                                                           |
| Rare PAV                            | 199                |                                                   |                        |                                                                                                                                                                                                                                                                                                           |
| Rare PAV, known IRD genes           | 5                  | Variants of Interest                              | Interpretation         | Justification                                                                                                                                                                                                                                                                                             |
|                                     |                    | NM_005559.3(LAMA1):c.2515C>T, p.(Pro839Ser) het   | Carrier of VUS         | High allele frequency in European (non-Finnish) population (gnomAD: 149/126698). Predicted deleterious <i>in silico</i> (SIFT: Deleterious (0); Polyphen22: Probably damaging (1.0)) Heterozygous change in recessive gene. Not previously reported as disease-causing                                    |
|                                     |                    | NM_000186.3(CFH):c.350+1G>T, p.(splice) het       | Likely Disease Causing | Mutation of canonical splice site. Predicted to result in loss of donor splice-site <i>in silico</i> Very rare allele in European (non-Finnish) population (gnomAD: 1/22296) Consistent with retinal phenotype and mode of inheritance Not previously reported as disease-causing                         |
|                                     |                    | NM_032119.3(ADGRV1):c.5785G>T, (p.Ala1929Ser) het | Benign                 | High allele frequency in European (non-Finnish) population (gnomAD: 173/126388). ClinVAR status: Likely Benign (SCV000063285.4) Equivocal <i>in silico</i> results (SIFT: Tolerated (0.16); Probably damaging 0.99) Heterozygous change in recessive gene. Gene does not correlate with patient phenotype |
|                                     |                    | NM_018942(HMX1):c.100C>A, p.(Arg34Ser) het        | Benign                 | Absent from gnomAD Predicted benign <i>in silico</i> (SIFT: Tolerated (0.76); Polyphen22: Benign (0)) Heterozygous change in recessive gene.                                                                                                                                                              |

Supplementary Data C

|  |  |                                                                 |        |                                                                                                                                                               |
|--|--|-----------------------------------------------------------------|--------|---------------------------------------------------------------------------------------------------------------------------------------------------------------|
|  |  |                                                                 |        | Gene does not correlate with patient phenotype.<br>Not previously reported as disease-causing                                                                 |
|  |  | NM_006702.4(PNPLA6):c.2945_2961del,<br>p.(Arg983ProfsTer31) het | Benign | Absent from gnomAD<br>Heterozygous change in recessive gene.<br>Gene does not correlate with patient phenotype.<br>Not previously reported as disease-causing |

| E:II.2 and E:III.11 WES data filtering |                    |                                                          |                     |                                                                                                                                                                                                                                                              |
|----------------------------------------|--------------------|----------------------------------------------------------|---------------------|--------------------------------------------------------------------------------------------------------------------------------------------------------------------------------------------------------------------------------------------------------------|
| Filter                                 | Number of Variants |                                                          |                     |                                                                                                                                                                                                                                                              |
| Rare shared                            | 119                |                                                          |                     |                                                                                                                                                                                                                                                              |
| Rare shared PAV                        | 106                |                                                          |                     |                                                                                                                                                                                                                                                              |
| Rare PAV, known IRD genes              | 4                  | Variants of Interest                                     | Interpretation      | Justification                                                                                                                                                                                                                                                |
|                                        |                    | NM_000186.3(CFH):c.1291T>A,<br>p.(Cys431Ser) het         | Pathogenic mutation | Ultra-rare variant (MAF: 0.000004)<br>Predicted deleterious <i>in silico</i> (SIFT: Deleterious (0); Polyphen22 (1.0))<br>Same mutation reported as disease-causing on multiple occasions (Saunders <i>et al.</i> , 2007; Dragon-Durey <i>et al.</i> , 2003) |
|                                        |                    | ENST00000264448.6(ALMS1):c.1267G>A,<br>p.(Val423Ile) het | Benign              | High allele frequency (gnomAD: 783/276990)<br>Heterozygous change in recessive gene<br>Gene does not correlate with patient phenotype<br>Predicted benign in silico (SIFT: tolerated (ClinVAR status: Benign (RCV000234139.2)                                |

Supplementary Data C

|  |  |                                                                    |               |                                                                                                                                                                                                                                                                                                      |
|--|--|--------------------------------------------------------------------|---------------|------------------------------------------------------------------------------------------------------------------------------------------------------------------------------------------------------------------------------------------------------------------------------------------------------|
|  |  | <p>NM_178857.5(RP1L1):c.568C&gt;T,<br/>p.(Arg190Cys) het</p>       | <p>Benign</p> | <p>High allele frequency (gnomAD: 542/277010)<br/>Equivocal <i>in silico</i> results (SIFT: Deleterious (0); Polyphen22: Benign (0.297))<br/>ClinVAR status: Likely Benign (RCV000389130.1)<br/>Gene does not correlate with patients phenotype<br/>Not previously reported as disease-causing</p>   |
|  |  | <p>NM_001004334.3(GPR179):c.5563C&gt;G,<br/>p.(Leu1855Val) het</p> | <p>Benign</p> | <p>High allele frequency (gnomAD: 725/276738)<br/>Heterozygous change in recessive gene<br/>Gene does not correlate with patient phenotype<br/>Equivocal <i>in silico</i> results (SIFT: Tolerated (0.13); Polyphen22: Possibly damaging (0.657))<br/>Not previously reported as disease-causing</p> |
