# Supplementary material for: Loss-of-Function Mutations in the CFH Gene Affecting Alternatively Encoded Factor H-like 1 Protein Cause Dominant Early-Onset Macular Drusen
Source: PubMed Central journal article supplement (PMC6856713; doi:10.1016/j.ophtha.2019.03.013), 2019-10
Supplement: mmc7.pdf [file mmc7.pdf]

**Supplementary Data D**

| Study                   | Study/Family ID | Age at onset (years) | Family history | Phenotype                                                                      | Mutation                          | Domain | ExAC/gnomAD freq       | Does mutation affect FHL-1 |
|-------------------------|-----------------|----------------------|----------------|--------------------------------------------------------------------------------|-----------------------------------|--------|------------------------|----------------------------|
| Boon et al., 2008       | A               | 45-67                | Yes            | Confluent macular drusen, mid-peripheral cystoid drusen, chorioretinal atrophy | c.1222C>T; p.(Gln408Ter) het      | 7      | 0.000004073            | Yes                        |
| Boon et al., 2008       | B               | 48-68                | Yes            | Confluent macular drusen, chorioretinal atrophy, discrete pigmentary changes   | c.1222C>T; p.(Gln408Ter) het      | 7      | 0.000004073            | Yes                        |
| Boon et al., 2008       | C               | 57                   | Yes            | Large, confluent macular drusen, small peripheral drusen                       | c.3234G>T, p.(Arg1078Ser) het     | 18     | 17/246214 (0.00006905) | No                         |
| Boon et al., 2008       | D               | 54                   | Yes            | Large confluent macular drusen, mid-peripheral cystoid drusen, PED             | c.350+6T>G het                    | int3_4 | -                      | Yes                        |
| Boon et al., 2008       | E               | 54                   | Yes            | Confluent macular drusen, small mid-peripheral drusen, PED                     | c.1699A>G; p.(Arg567Gly) het      | 10     | 1/243758 (0.000004102) | No                         |
| Van de Ven et al., 2012 | A               | 18-56                | Yes            | Extensive small and large confluent drusen, macula PED                         | c.550delA; p.(Ile184Leufs*33) het | 3      | -                      | Yes                        |
| Yu et al., 2014         | II              | <60                  | Yes            | Early-onset AMD                                                                | c.269A>G; p.(Asp90Gly) het        | 2      | 1/246070 (0.000004064) | Yes                        |
| Yu et al., 2014         | V               | <60                  | Yes            | Early-onset AMD                                                                | c.157C>T; p.(Arg53Cys) het        | 1      | 4/276658 (0.00001446)  | Yes                        |
| Duvvari et al., 2015    | 1               | n.d.                 | Unknown        | Cuticular drusen                                                               | c.7C>G; p.(Leu3Val) het           | SP     | 67/276914 (0.0002420)  | Yes                        |

## Supplementary Data D

|                      |    |      |         |                  |                                         |        |                             |     |
|----------------------|----|------|---------|------------------|-----------------------------------------|--------|-----------------------------|-----|
| Duvvari et al., 2015 | 2  | n.d. | Unknown | Cuticular drusen | c.428-2A>G                              | int2_3 | -                           | Yes |
| Duvvari et al., 2015 | 3  | n.d. | Unknown | Cuticular drusen | c.481G>T; p.(Ala161Ser)<br>het          | 3      | 19/245854<br>(0.00007728)   | Yes |
| Duvvari et al., 2015 | 5  | n.d. | Unknown | Cuticular drusen | c.524G>A; p.(Arg175Gln)<br>het          | 3      | -                           | Yes |
| Duvvari et al., 2015 | 6  | n.d. | Unknown | Cuticular drusen | c.578C>T; p.(Ser193Leu)<br>het          | 3      | -                           | Yes |
| Duvvari et al., 2015 | 7  | n.d. | Unknown | Cuticular drusen | c.647T>C; p.(Ile216Thr)<br>het          | 4      | 31/275272<br>(0.0001126)    | Yes |
| Duvvari et al., 2015 | 8  | n.d. | Unknown | Cuticular drusen | c.901_902del;<br>p.(Ala301Asnfs*25) het | 5      | -                           | Yes |
| Duvvari et al., 2015 | 9  | n.d. | Unknown | Cuticular drusen | c.1135T>C; p.(Trp379Arg)<br>het         | 6      | -                           | Yes |
| Duvvari et al., 2015 | 10 | n.d. | Unknown | Cuticular drusen | c.1198C>A; p.(Gln400Lys)<br>het         | 7      | 32/276144<br>(0<br>0001159) | Yes |
| Duvvari et al., 2015 | 11 | n.d. | Unknown | Cuticular drusen | c.1198C>A; p.(Gln400Lys)<br>het         | 7      | 32/276144<br>(0<br>0001159) | Yes |
| Duvvari et al., 2015 | 12 | n.d. | Unknown | Cuticular drusen | c.2850G>C; p.(Gln950His)<br>het         | 16     | -                           | No  |
| Duvvari et al., 2015 | 13 | n.d. | Unknown | Cuticular drusen | c.2850G>C; p.(Gln950His)<br>het         | 16     | -                           | No  |
| Duvvari et al., 2015 | 14 | n.d. | Unknown | Cuticular drusen | c.2867C>T; p.(Thr956Met)<br>het         | 16     | 358/277112<br>(0.001292)    | No  |

## Supplementary Data D

|                      |       |       |         |                                                                                                       |                               |        |                        |     |
|----------------------|-------|-------|---------|-------------------------------------------------------------------------------------------------------|-------------------------------|--------|------------------------|-----|
| Duvvari et al., 2015 | 15    | n.d.  | Unknown | Cuticular drusen                                                                                      | c.3628C>T; p.(Arg1210Cys) het | 20     | 40/276980 (0.0001444)  | No  |
| Duvvari et al., 2015 | 16    | n.d.  | Unknown | Cuticular drusen                                                                                      | c.3628C>T; p.(Arg1210Cys) het | 20     | 40/276980 (0.0001444)  | No  |
| Hughes et al., 2016  | Anon. | 55    | Unknown | Early-onset AMD                                                                                       | c.415C>G, p.(Pro139Ala) het   | 2      | 1/245274 (0.000004077) | Yes |
| Wagner et al., 2016  | A     | 46-67 | Yes     | Large macular and extra-macular drusen in the region temporal to the macular                          | c.575G>T; p.(Cys192Phe) het   | 3      | -                      | Yes |
| Wagner et al., 2016  | B     | n.d.  | Yes     | Macular and extensive extra-macular drusen (nasal to the macular and temporal to the vascular arcade) | c.790+1G>A                    | int4_5 | -                      | Yes |
| Wagner et al., 2016  | C     | n.d.  | Yes     | Early-onset AMD                                                                                       | c.524G>C; p.(Arg175Pro) het   | 3      | 1/245732 (0.000004069) | Yes |
| Wagner et al., 2016  | D     | n.d.  | Yes     | Early-onset AMD                                                                                       | c.380G>A; p.(Arg127His) het   | 2      | -                      | Yes |
| Duvvari et al., 2016 | 3     | n.d.  | No      | Cuticular drusen                                                                                      | c.518C>G, p.(Ala173Gly) het   | CC3    | -                      | Yes |

PED: Pigment epithelial detachment; Pt: patient; Dx: diagnosed; AMD: Age-related macular degeneration; n.d.: not disclosed
